# Supplementary material
Source: PubMed Central journal article supplement (PMC11391745)

S1a

ARC

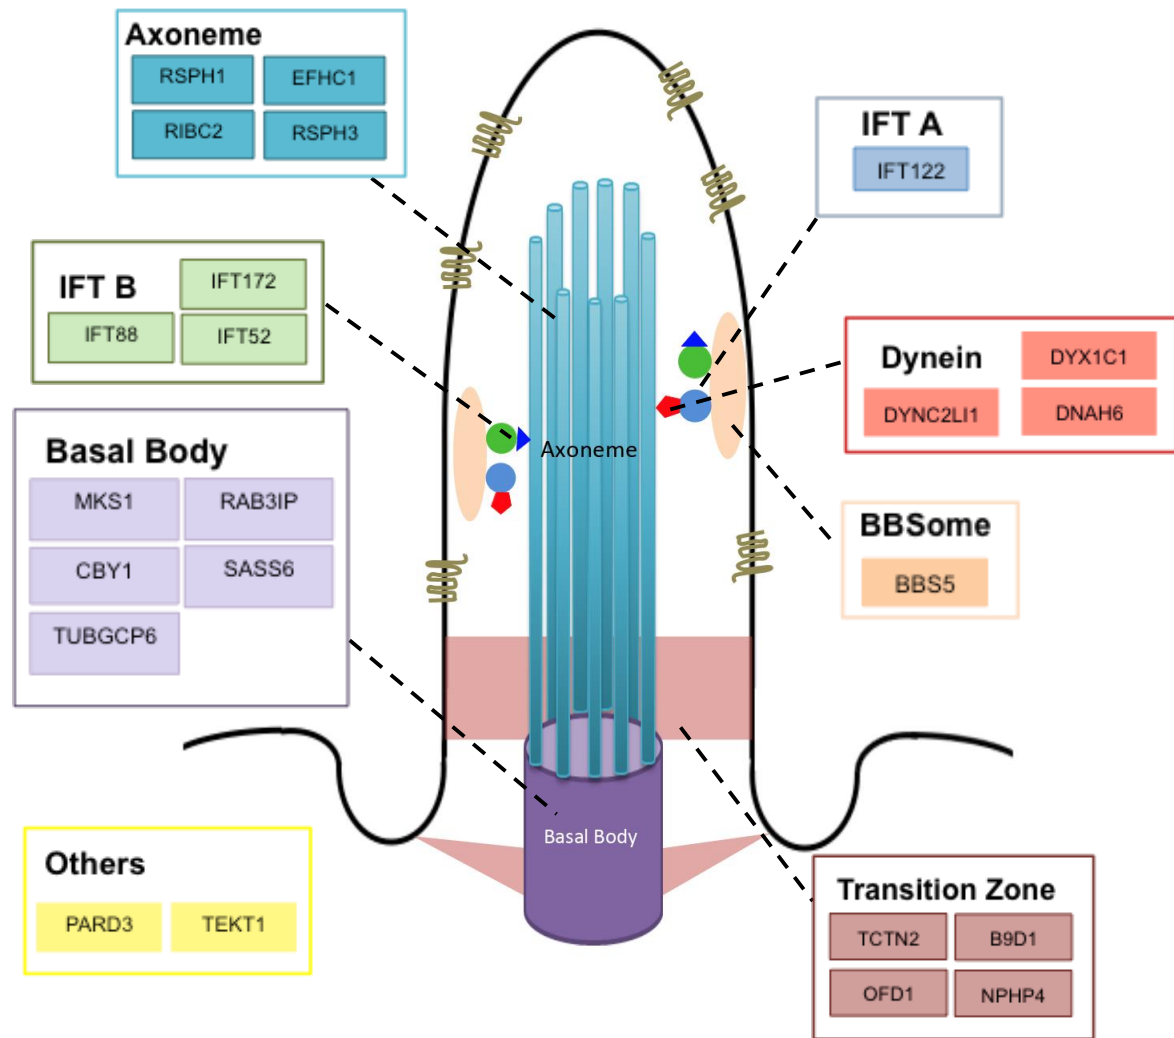

S1b

DMH

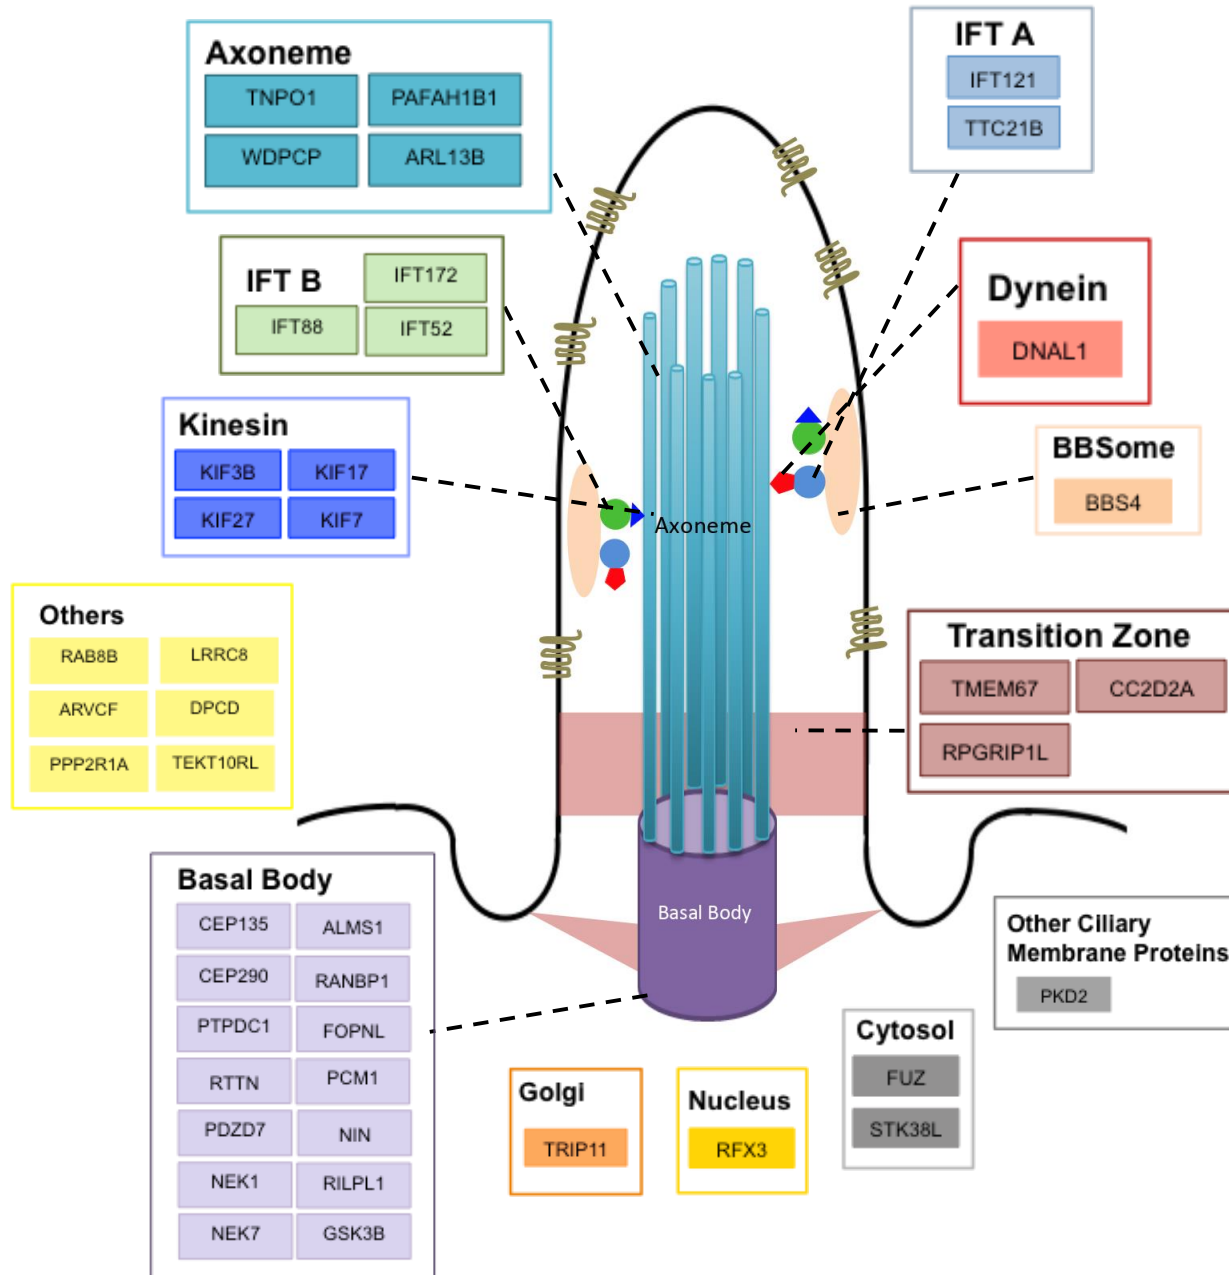

S1c

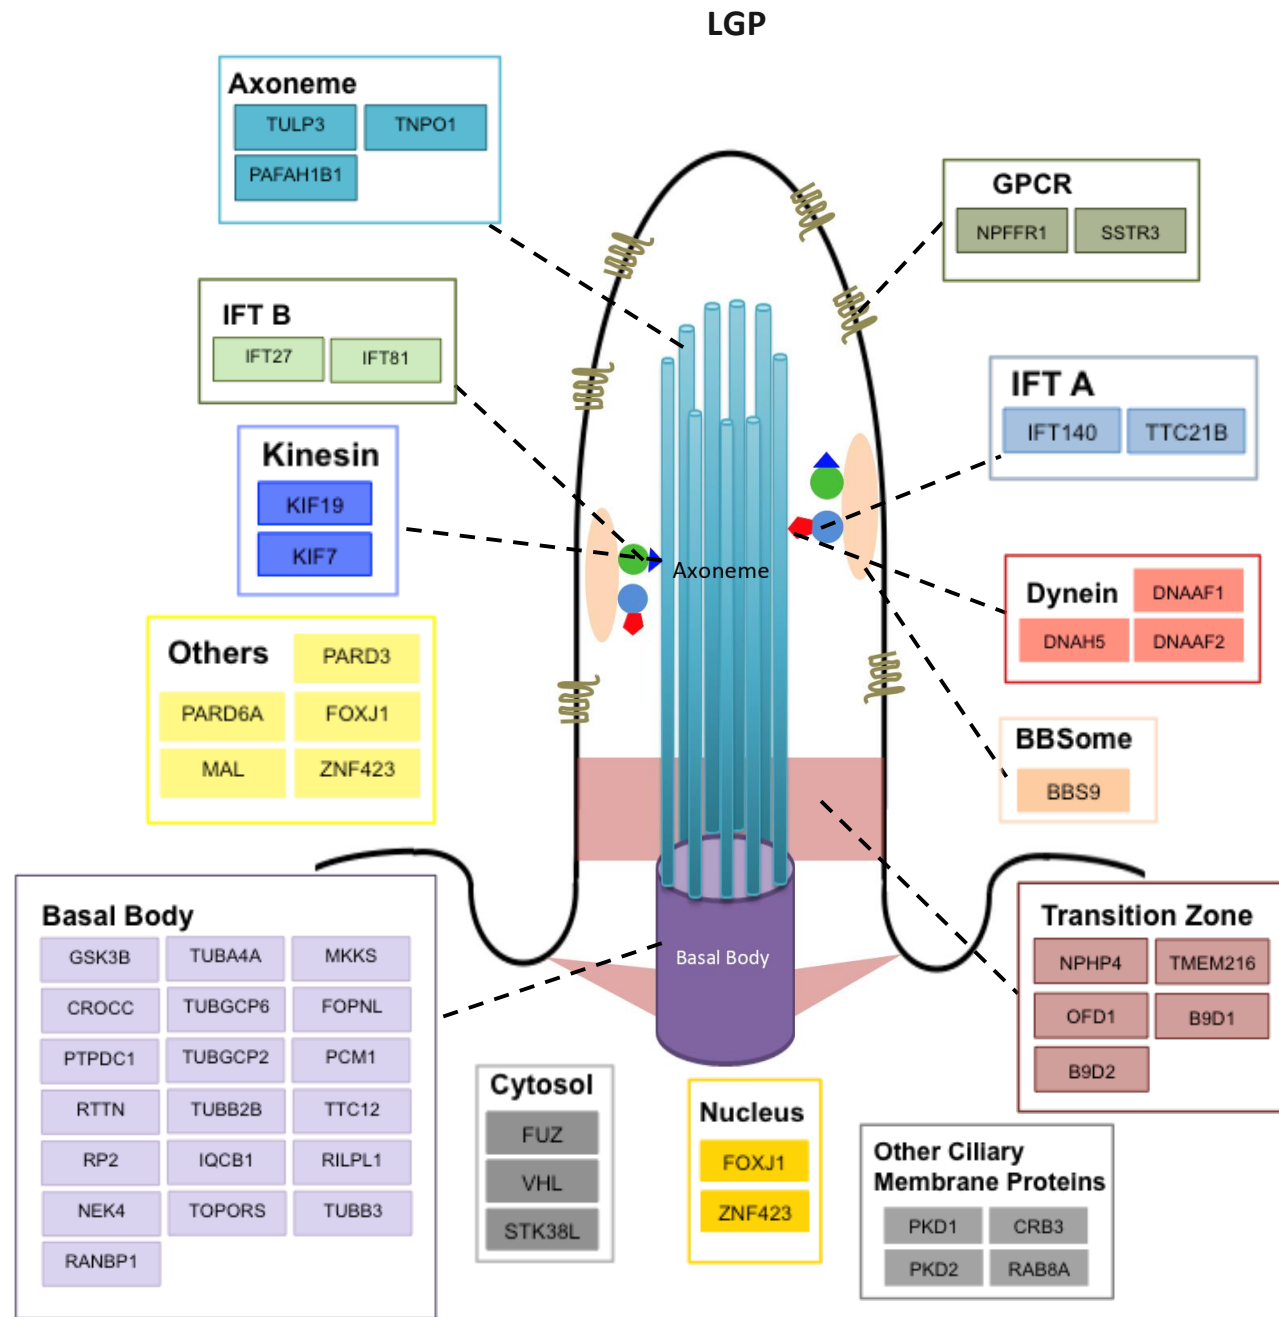

S1d

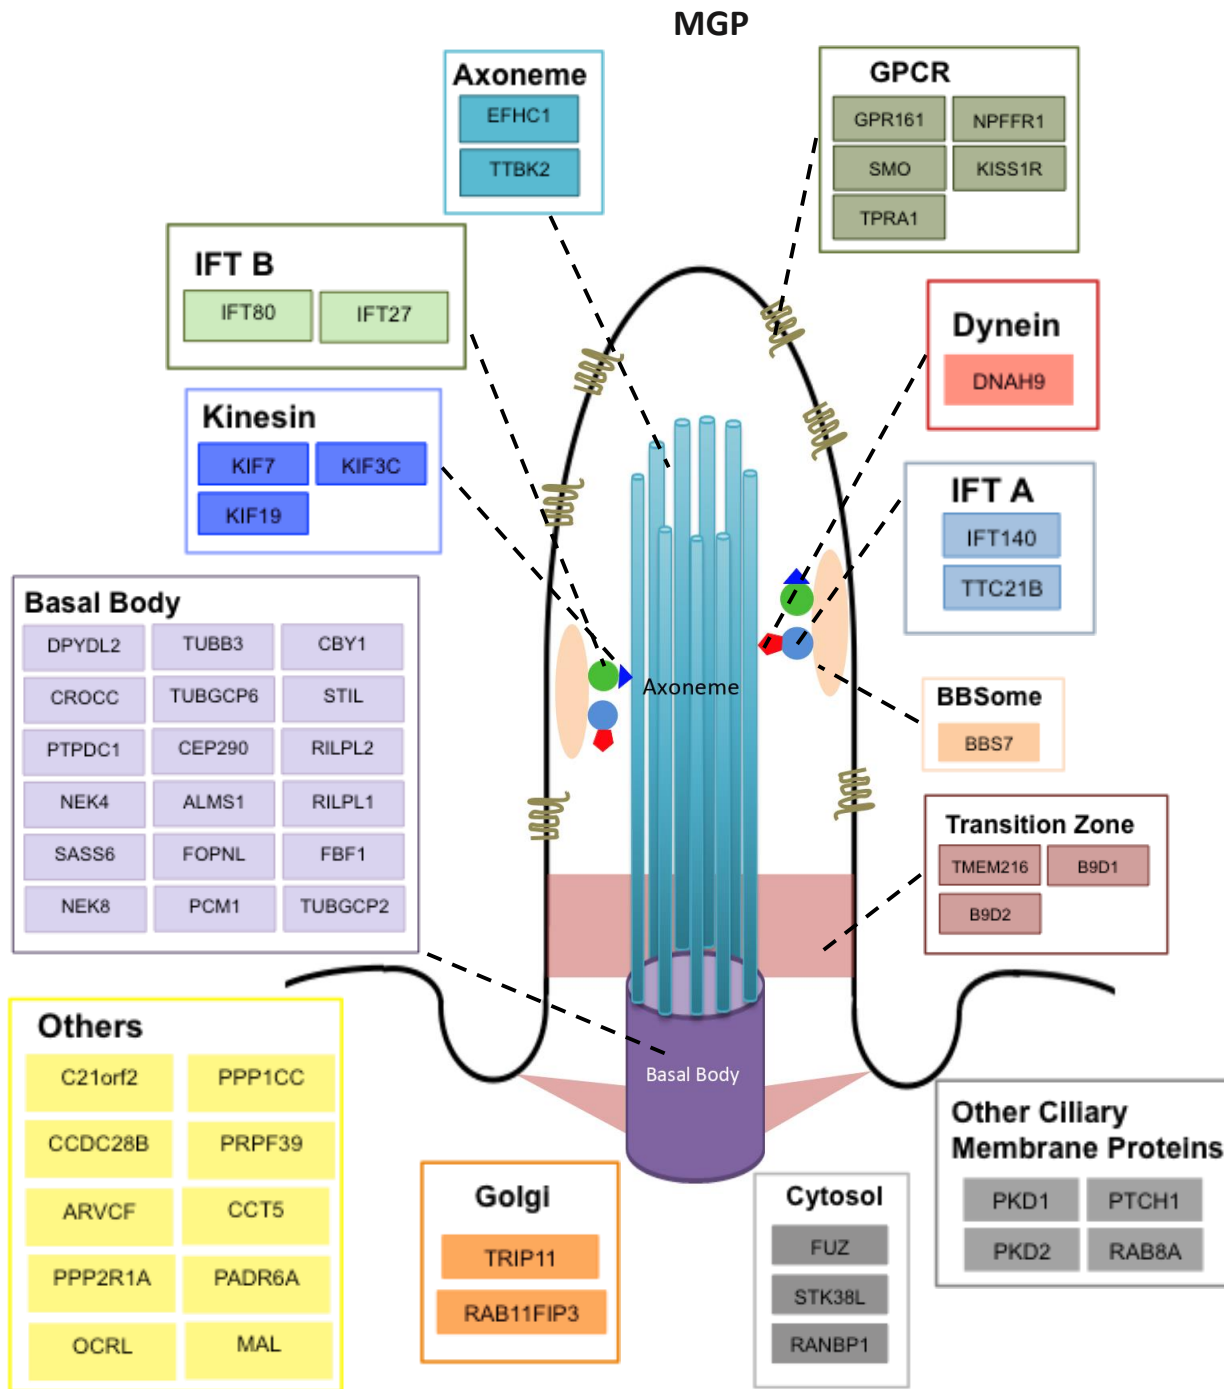

S1e

MMB

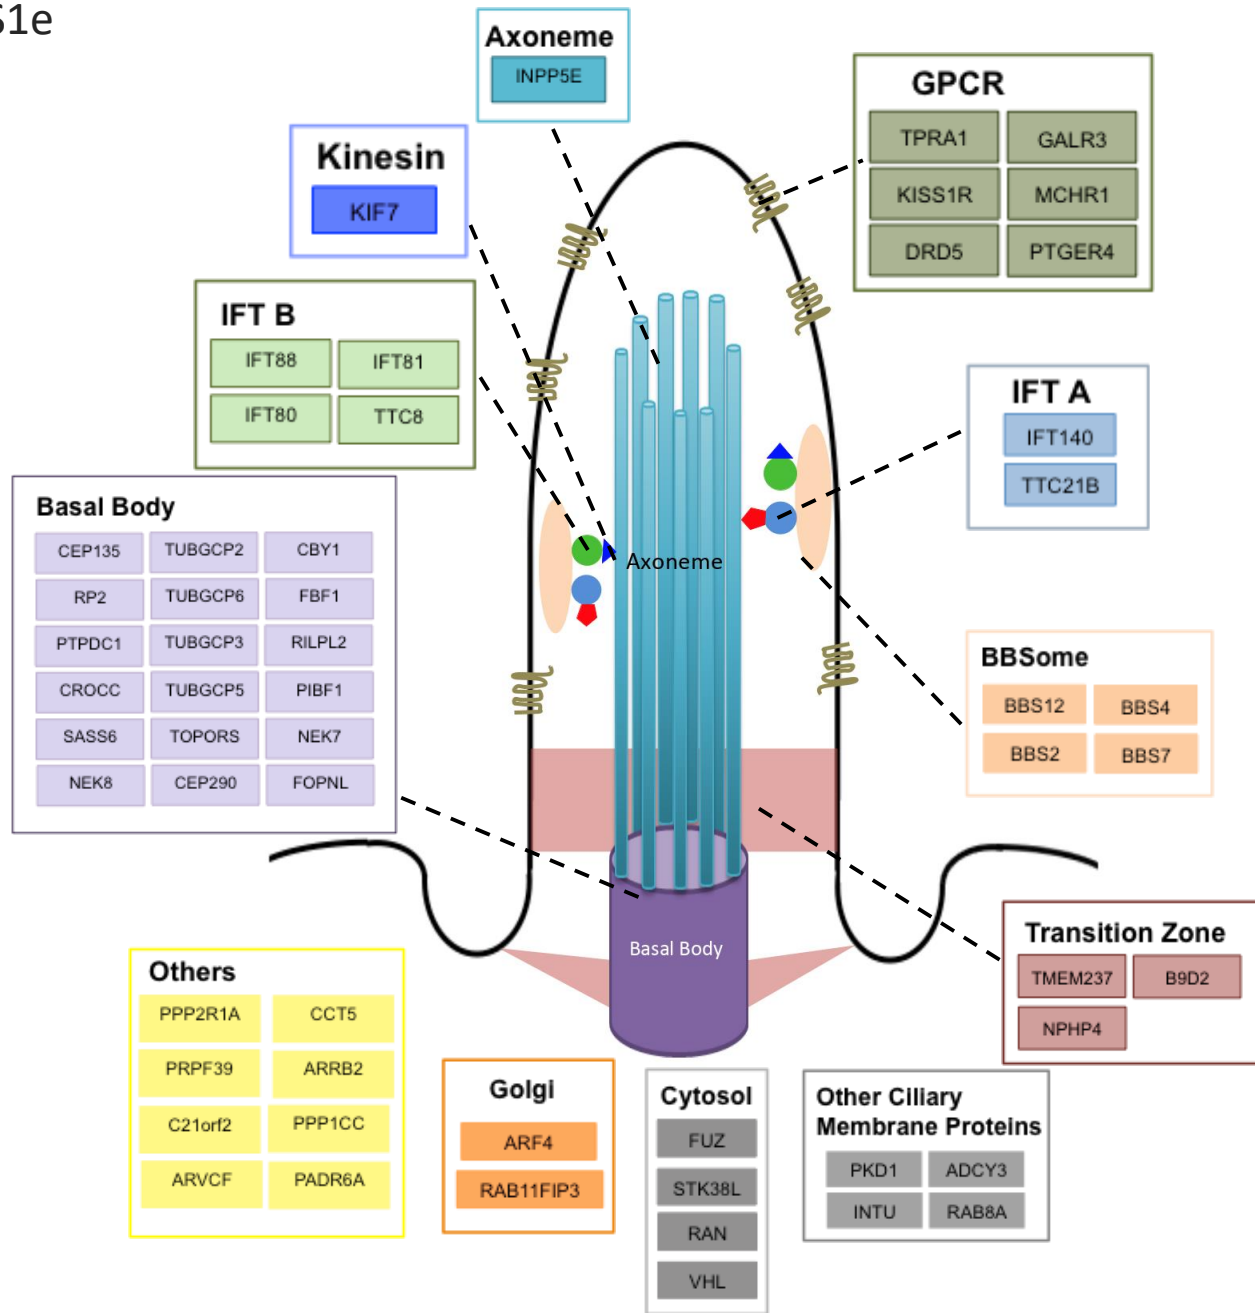

S1f

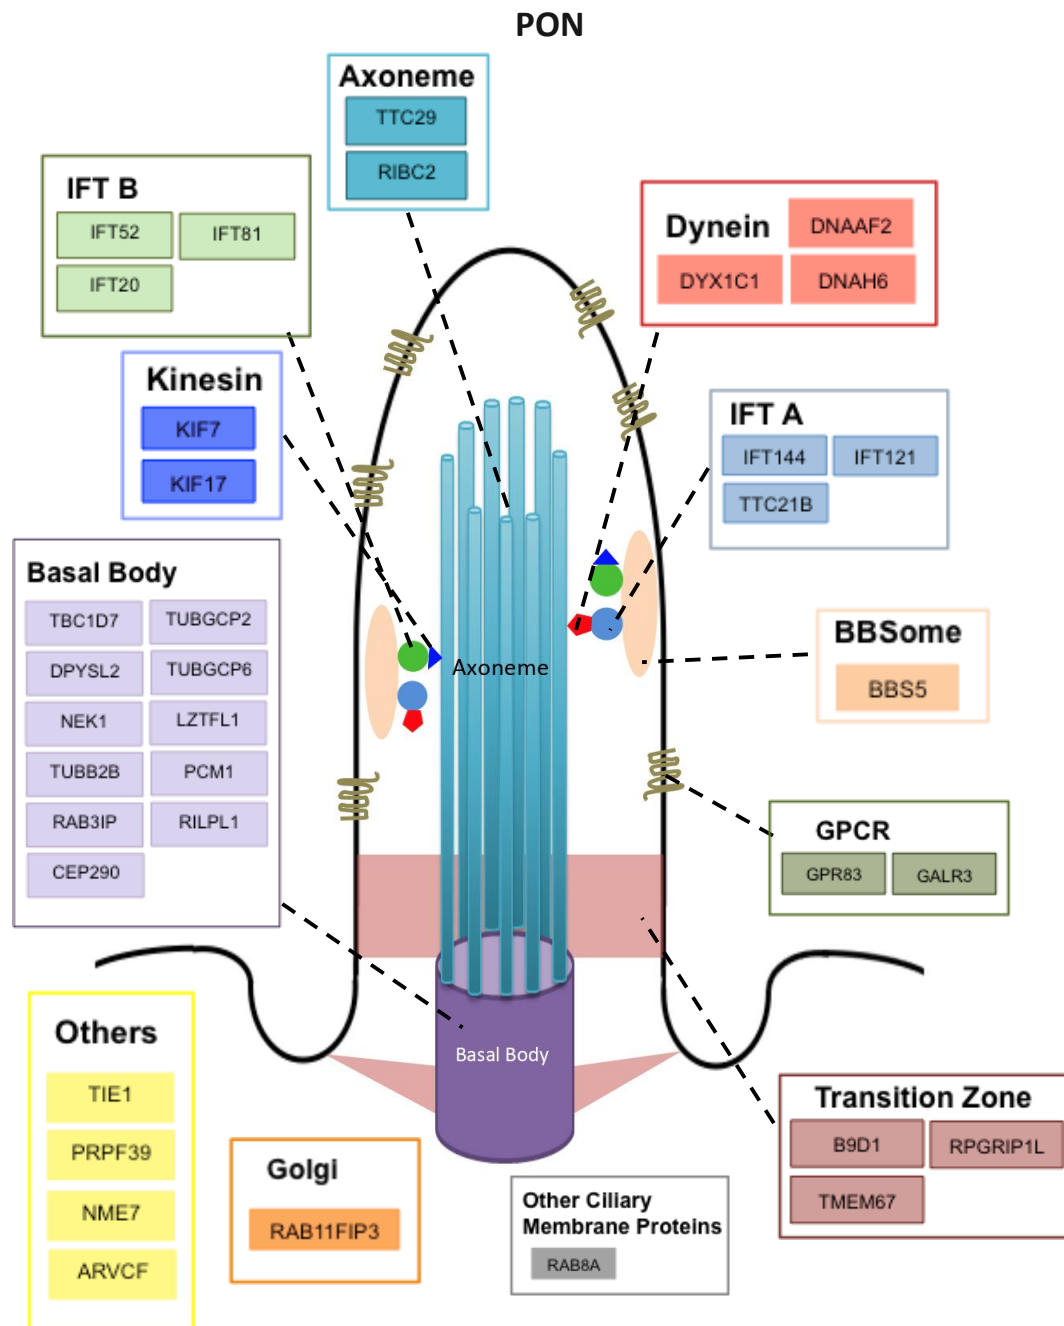

S1g

PRA

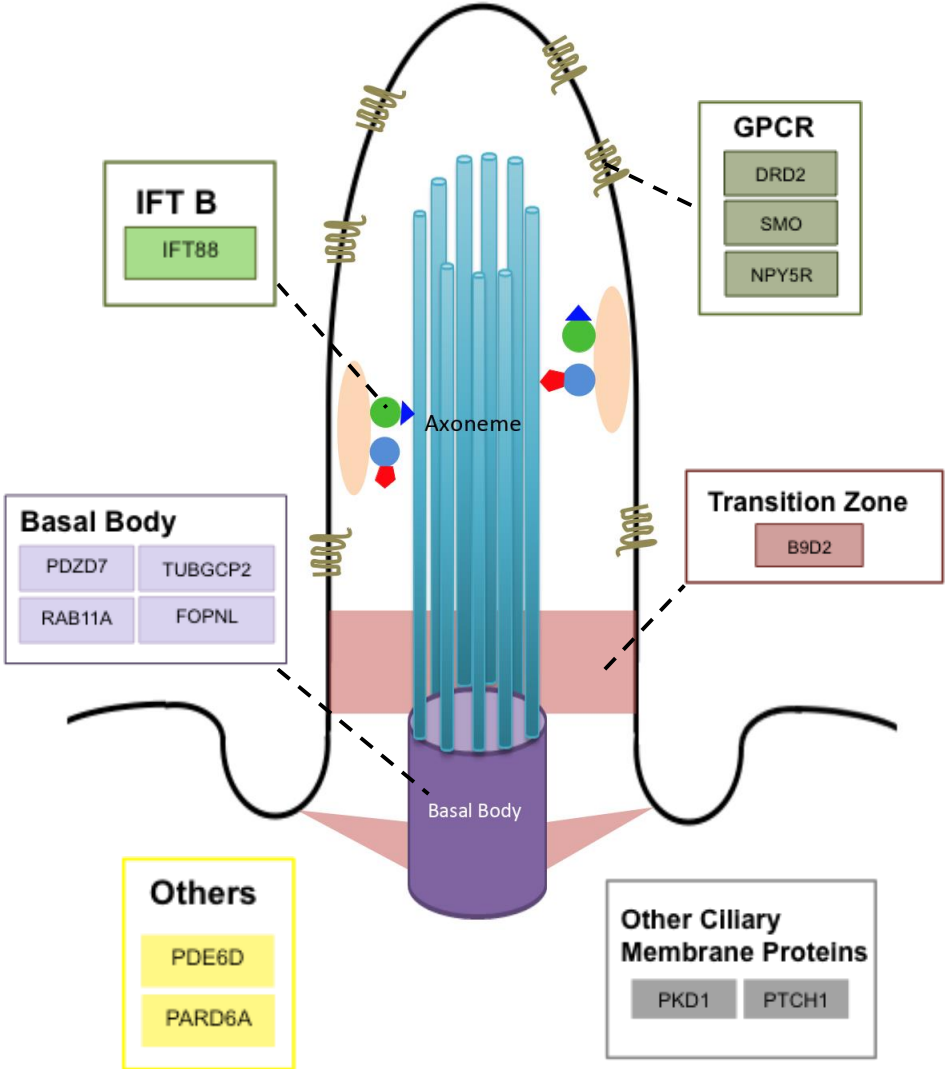

S1h

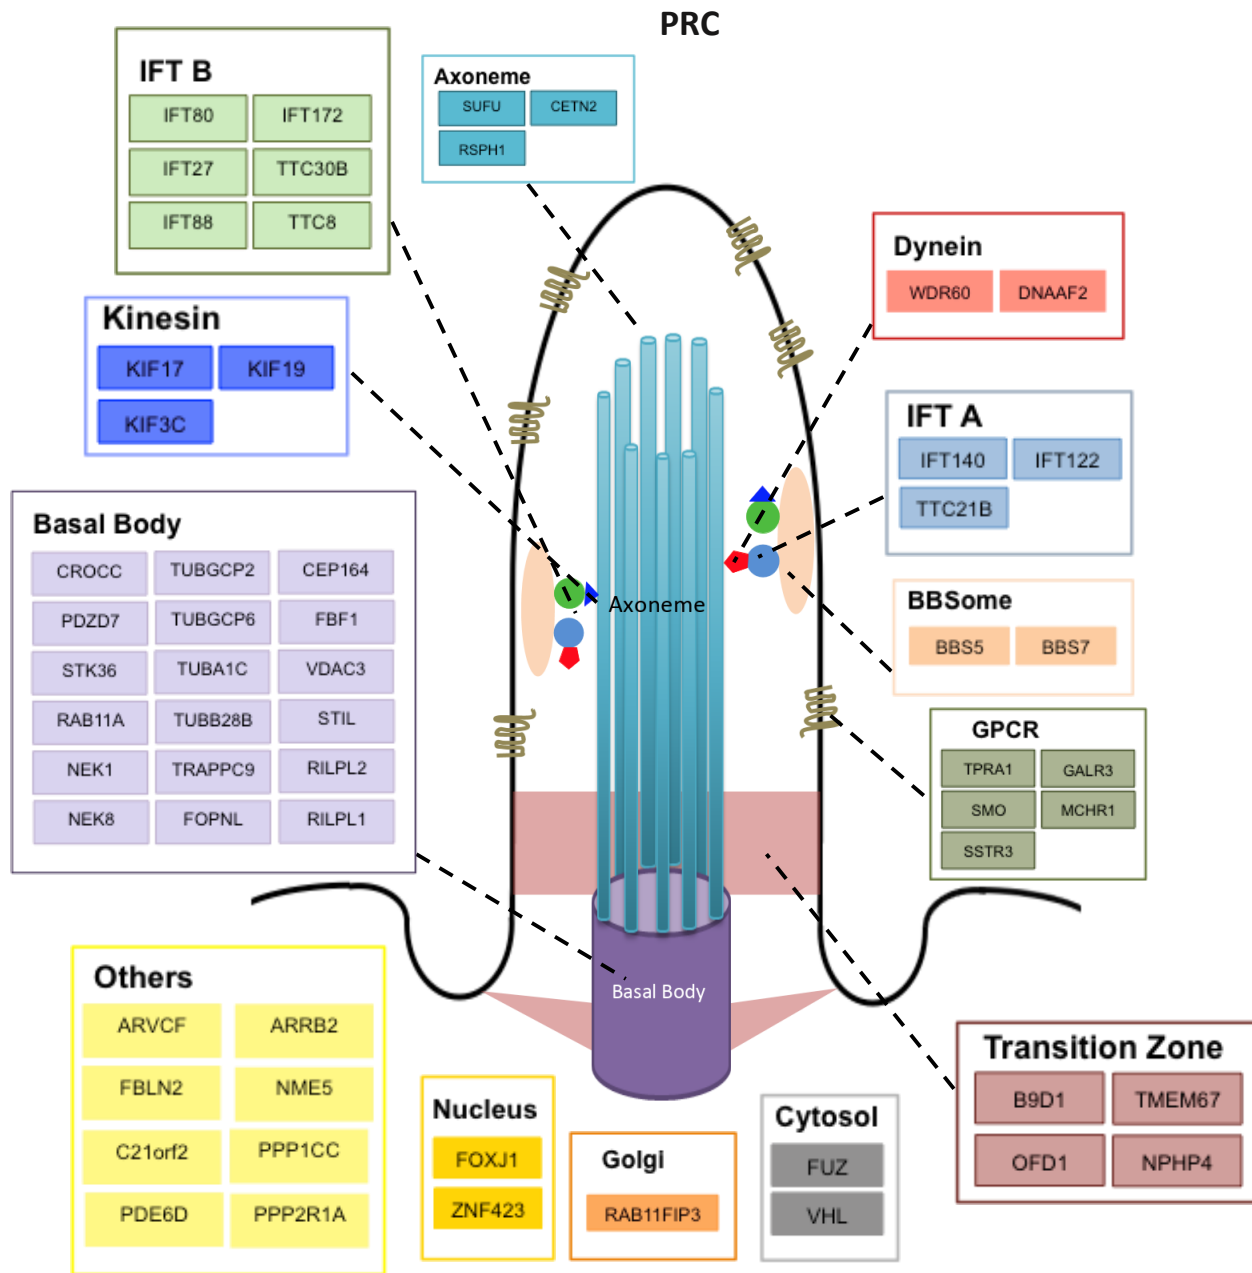



S1i

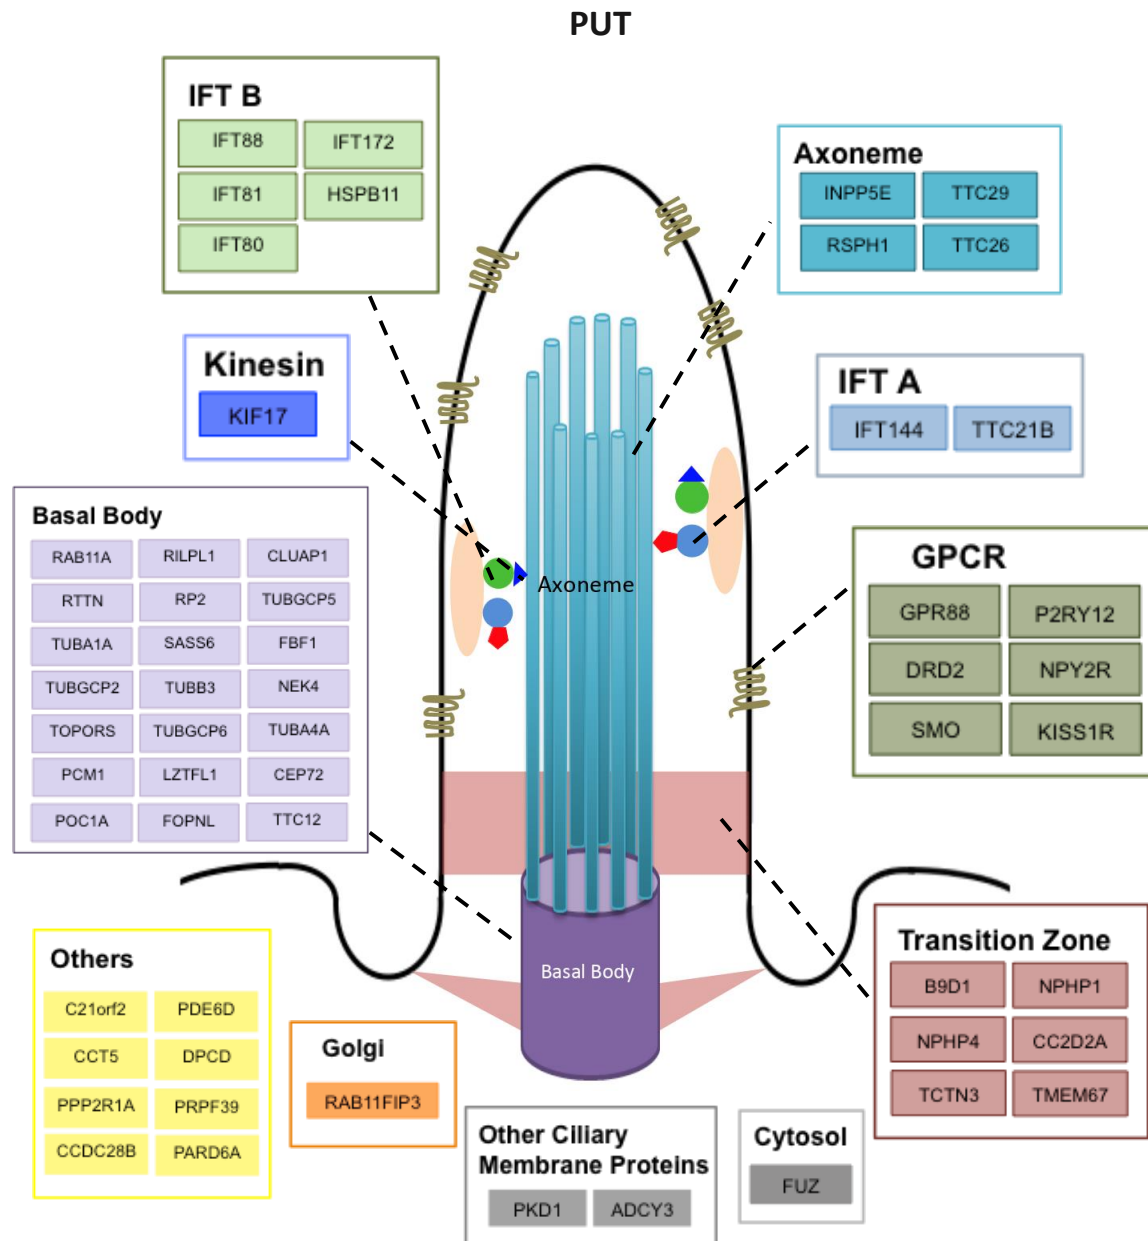

S1j

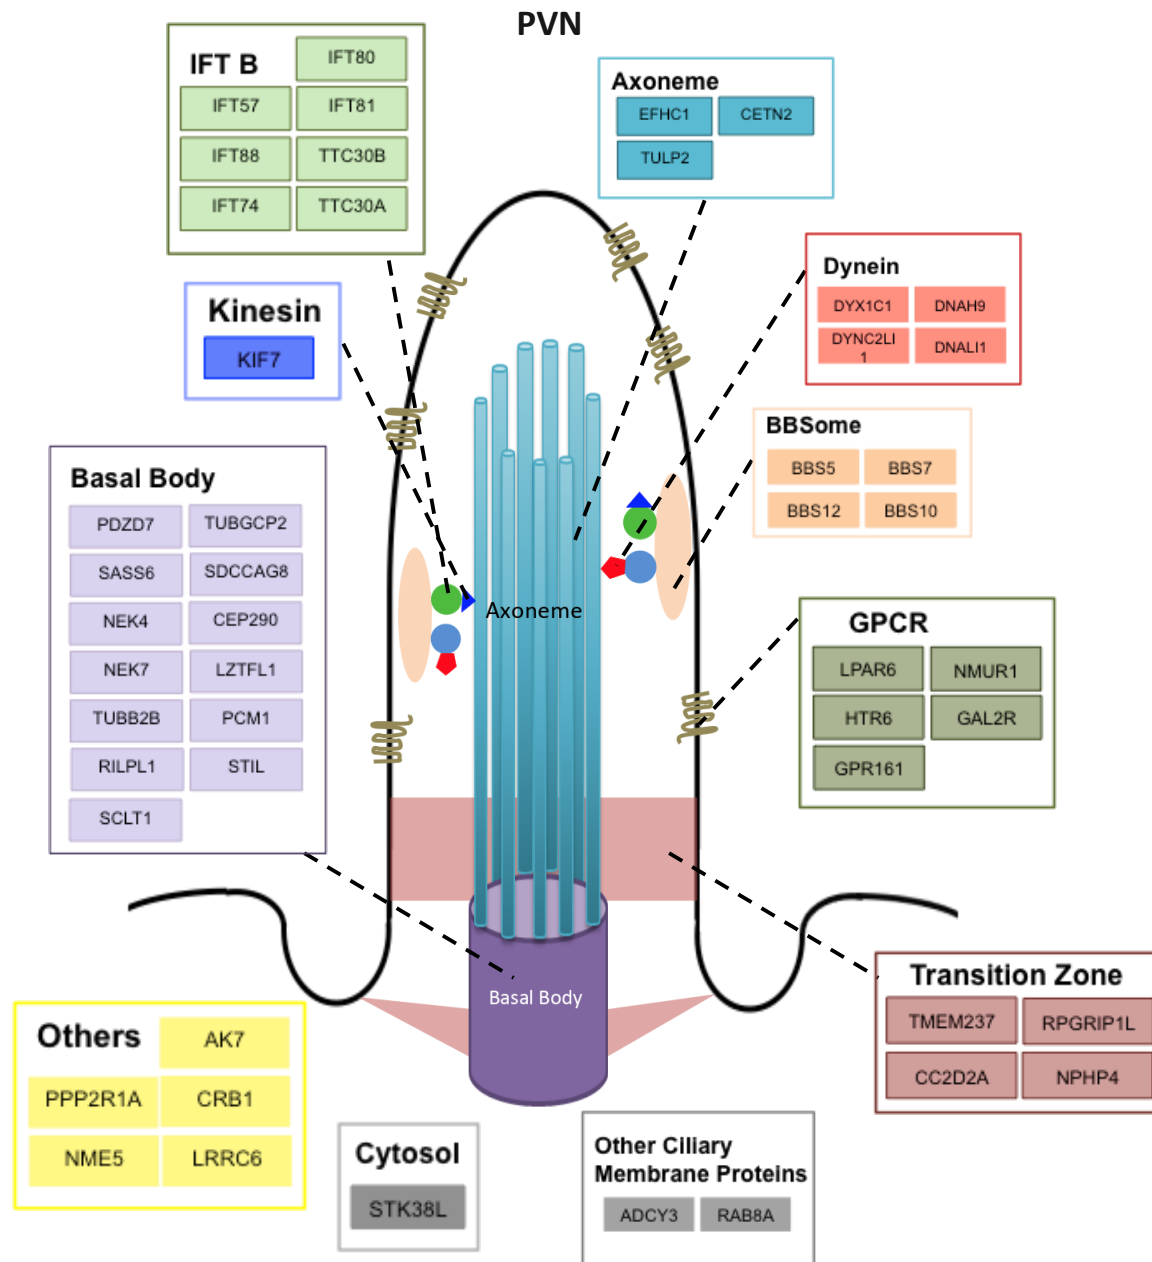

S1k

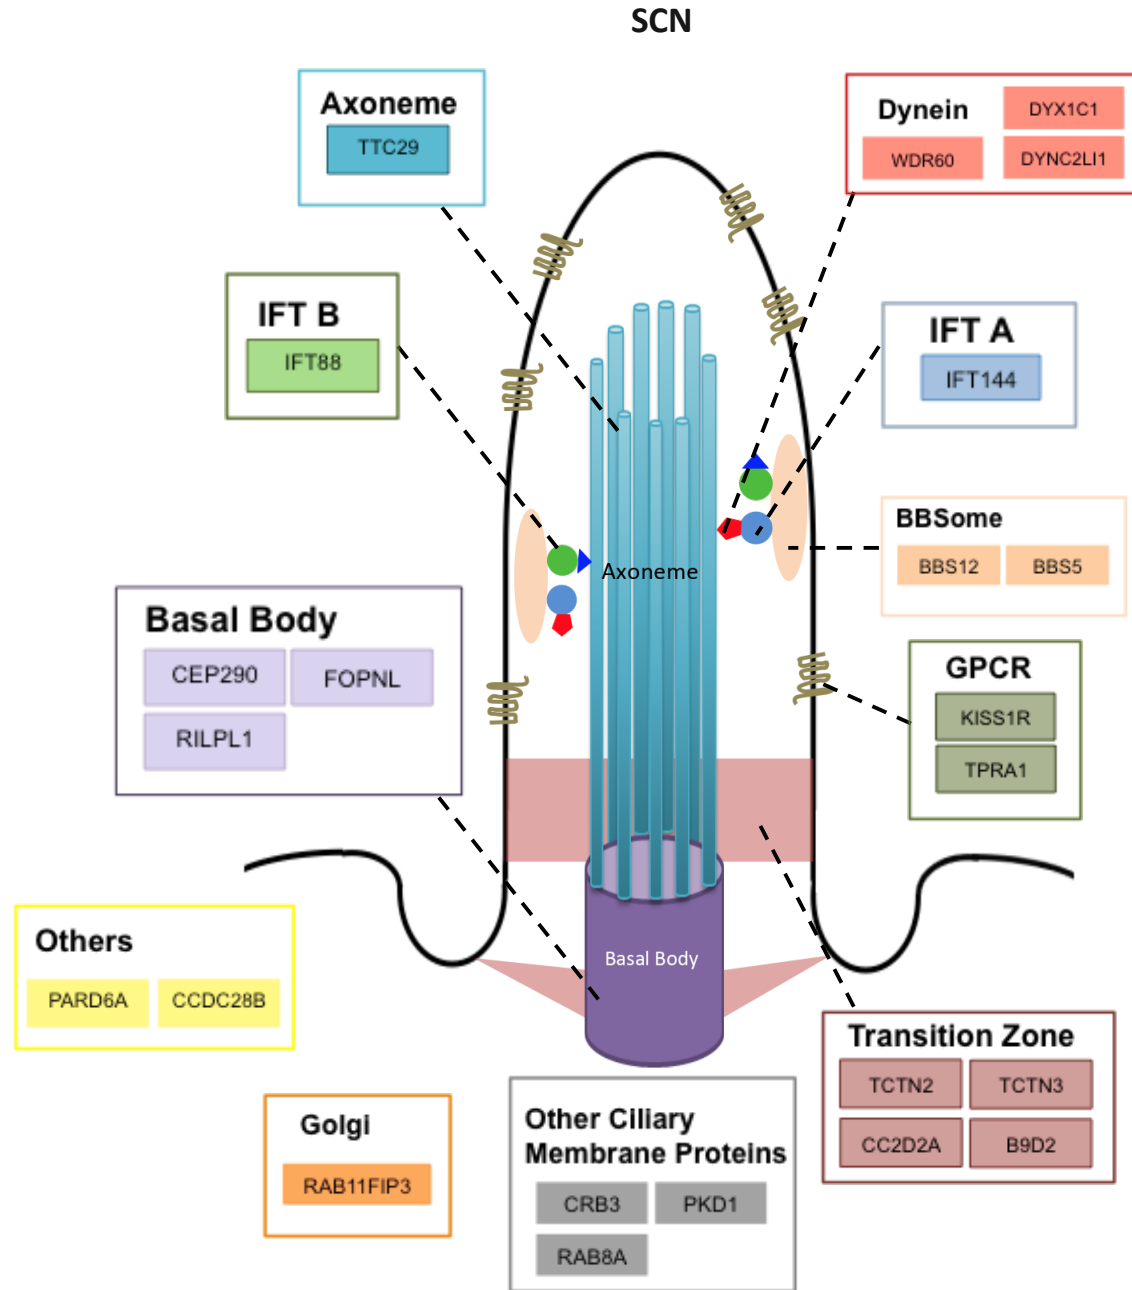

VIC

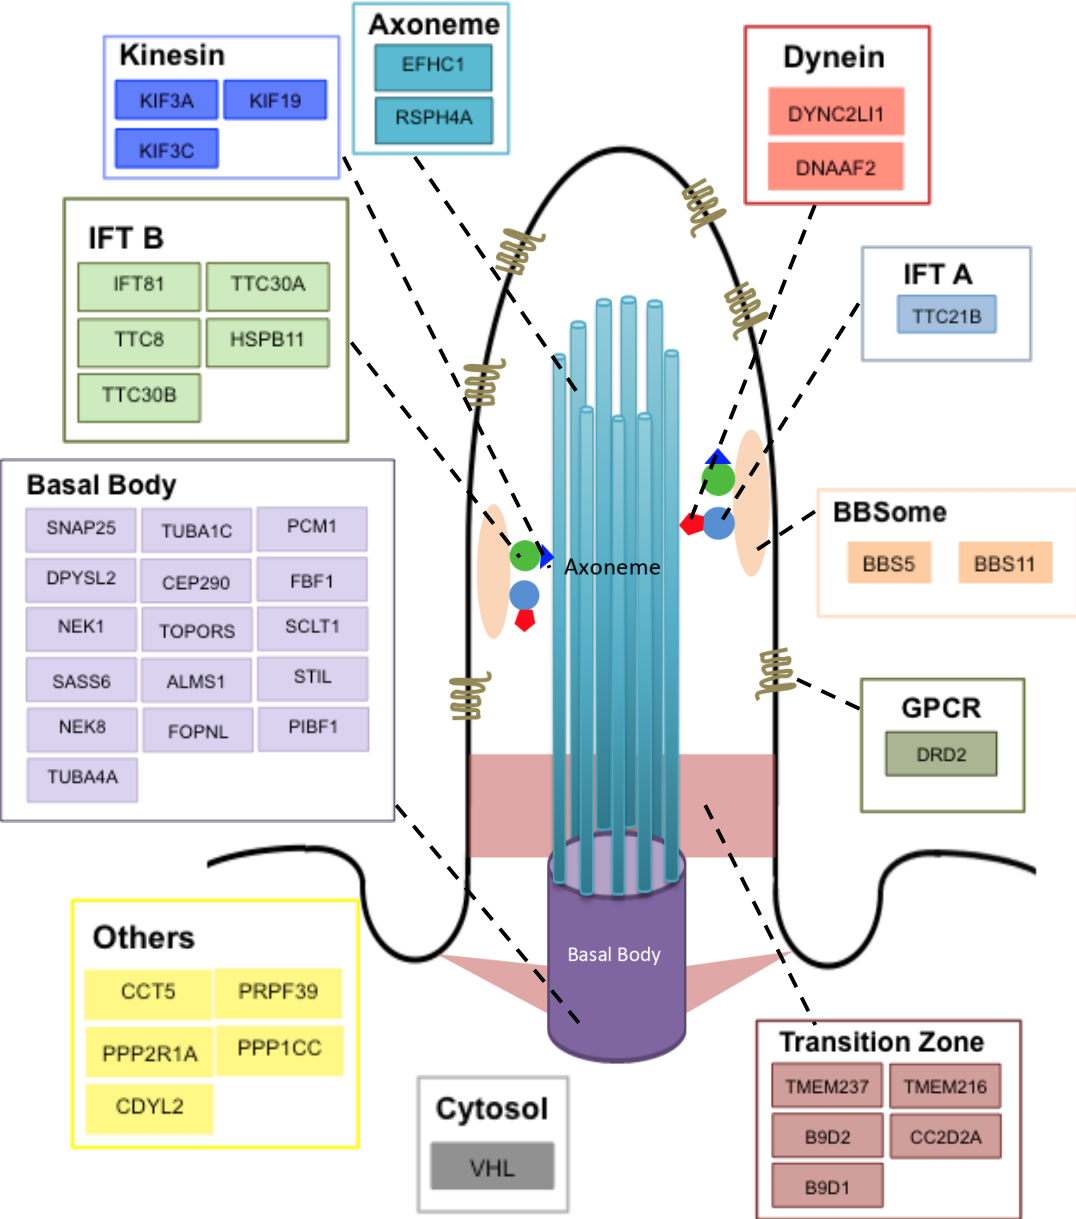

Supplement: NIHMS2017828-supplement-jnr24919-sup-0003-figs1.pdf [file NIHMS2017828-supplement-jnr24919-sup-0003-figs1.pdf]
